# Supplementary material for: Identification and validation of a T-cell-related MIR600HG/hsa-mir-21-5p competing endogenous RNA network in tuberculosis activation based on integrated bioinformatics approaches
Source: Front Genet. 2022 Sep 20;13:979213. doi: 10.3389/fgene.2022.979213 (PMC9531151; doi:10.3389/fgene.2022.979213)
Supplement: Supplementary file 7 [file Table4.XLSX]

## Sheet: Sheet1
Supplementary Table 4 The correlation between critical T cells and gene biomarkers evaluated by Spearman correlation analysis
T cells	Genes	Training set		Testing set
		R	p value	R	p value
CD4	BCL11B	0.71	< 2.2e-16	0.78	< 2.2e-16
	EPHA4	0.69	< 2.2e-16	0.77	< 2.2e-16
	ETS1	0.67	< 2.2e-16	0.73	< 2.2e-16
	MIR600HG	0.64	< 2.2e-16	0.74	< 2.2e-16
	KLF12	0.59	< 2.2e-16	0.68	< 2.2e-16
	KMT2A	0.43	2.16e-11	0.51	4.89e-11
	hsa-mir-21-5p	-0.34	2.11e-07	-0.53	1.49e-11
Tr1	BCL11B	0.67	< 2.2e-16	0.72	< 2.2e-16
	EPHA4	0.66	< 2.2e-16	0.73	< 2.2e-16
	ETS1	0.62	< 2.2e-16	0.68	< 2.2e-16
	MIR600HG	0.63	< 2.2e-16	0.72	< 2.2e-16
	KLF12	0.6	< 2.2e-16	0.66	< 2.2e-16
	KMT2A	0.44	1.31e-11	0.48	1.99e-09
	hsa-mir-21-5p	-0.34	2.38e-07	-0.48	1.41e-09
nTreg	BCL11B	0.57	< 2.2e-16	0.73	< 2.2e-16
	EPHA4	0.53	< 2.2e-16	0.65	< 2.2e-16
	ETS1	0.52	< 2.2e-16	0.64	< 2.2e-16
	MIR600HG	0.47	1.61e-13	0.65	< 2.2e-16
	KLF12	0.49	6.86e-15	0.63	< 2.2e-16
	KMT2A	0.36	2.93e-08	0.55	1.09e-12
	hsa-mir-21-5p	-0.3	8.53e-06	-0.54	3.9e-12
iTreg	BCL11B	0.62	< 2.2e-16	0.72	< 2.2e-16
	EPHA4	0.59	< 2.2e-16	0.68	< 2.2e-16
	ETS1	0.57	< 2.2e-16	0.68	< 2.2e-16
	MIR600HG	0.53	< 2.2e-16	0.67	< 2.2e-16
	KLF12	0.57	< 2.2e-16	0.66	< 2.2e-16
	KMT2A	0.42	1.32e-10	0.49	4.47e-10
	hsa-mir-21-5p	-0.31	2.81e-06	-0.46	6.98e-09
Tfh	BCL11B	0.75	< 2.2e-16	0.83	< 2.2e-16
	EPHA4	0.66	< 2.2e-16	0.69	< 2.2e-16
	ETS1	0.72	< 2.2e-16	0.78	< 2.2e-16
	MIR600HG	0.64	< 2.2e-16	0.64	< 2.2e-16
	KLF12	0.67	< 2.2e-16	0.73	< 2.2e-16
	KMT2A	0.46	9.16e-13	0.52	1.78e-11
	hsa-mir-21-5p	-0.45	3.32e-12	-0.59	9.46e-15
